# Supplementary material for: Content and activity of human liver microsomal protein and prediction of individual hepatic clearance in vivo
Source: PubMed Central journal article supplement (PMC4669488; doi:10.1038/srep17671), 2015-12-04
Supplement: srep17671-s1.pdf [file srep17671-s1.pdf]

## Supporting information

### Content and activity of human liver microsomal protein and prediction of individual hepatic clearance in vivo

Haifeng Zhang<sup>#</sup>, Na Gao<sup>#</sup>, Xin Tian, Tingting Liu, Yan Fang, Jun Zhou, Qiang Wen,

Binbin Xu, Bing Qi, Jie Gao, Hongmeng Li, Linjing Jia and Hailing Qiao \*

Institute of Clinical Pharmacology, Zhengzhou University, Zhengzhou, China

**Supplementary Table S1. Values for five parameters used to predict the hepatic tolbutamide clearance (n = 78)**

|                                               | Range           | Mean $\pm$ SD        | 95% PI          |
|-----------------------------------------------|-----------------|----------------------|-----------------|
| MPPGL (mg/g)                                  | 9.93-127.95     | 41.93 $\pm$ 24.50    | 14.23-116.79    |
| CL <sub>int, in vitro</sub> ( $\mu$ l/mg/min) | 0.20-4.18       | 1.32 $\pm$ 0.75      | 0.30-3.16       |
| Liver Weight (g)                              | 1100.00-1688.09 | 1341.67 $\pm$ 136.96 | 1124.40-1651.49 |
| Q <sub>H</sub> (ml/min)                       | 1205.40-1629.25 | 1322.71 $\pm$ 103.02 | 1205.40-1629.25 |
| Body Weight (kg)                              | 45-92           | 64.31 $\pm$ 10.95    | 46.95-89.08     |

MPPGL: microsomal protein per gram of liver; CL<sub>int, in vitro</sub>: in vitro metabolic clearance; Q<sub>H</sub>: hepatic blood flow.

## Supplementary Figures

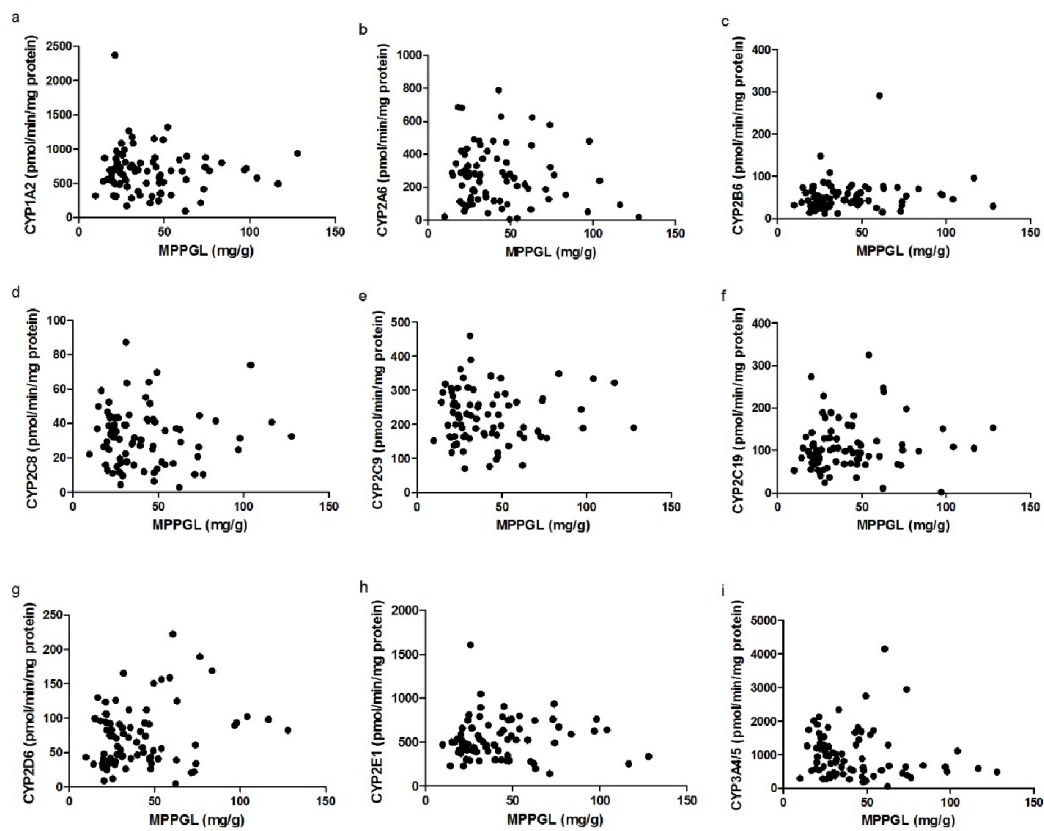

**Supplementary Fig. S1.** Relationship between MPPGL content and 10 CYP activity based on microsomes ( $V_M$ ). There was no significant correlation between MPPGL contents and  $V_M$  of 10 CYPs ( $P > 0.05$ ).

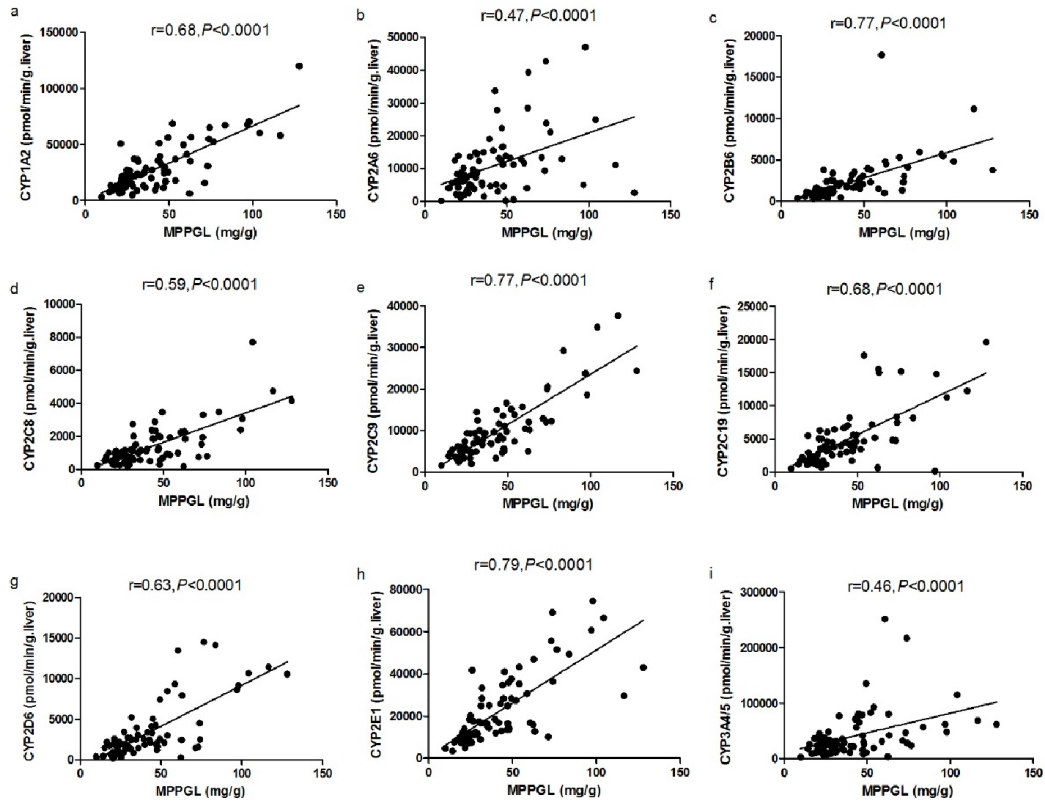

**Supplementary Fig. S2.** Relationship between MPPGL content and 10 CYP activity based on liver tissues ( $V_L$ ). There were strong correlations ( $r \geq 0.6, P < 0.001$ ) between MPPGL contents and  $V_L$  of CYPs besides CYP2A6, CYP3A4/5, CYP2C8 (moderate correlations,  $0.3 \leq r < 0.6, P < 0.001$ ).

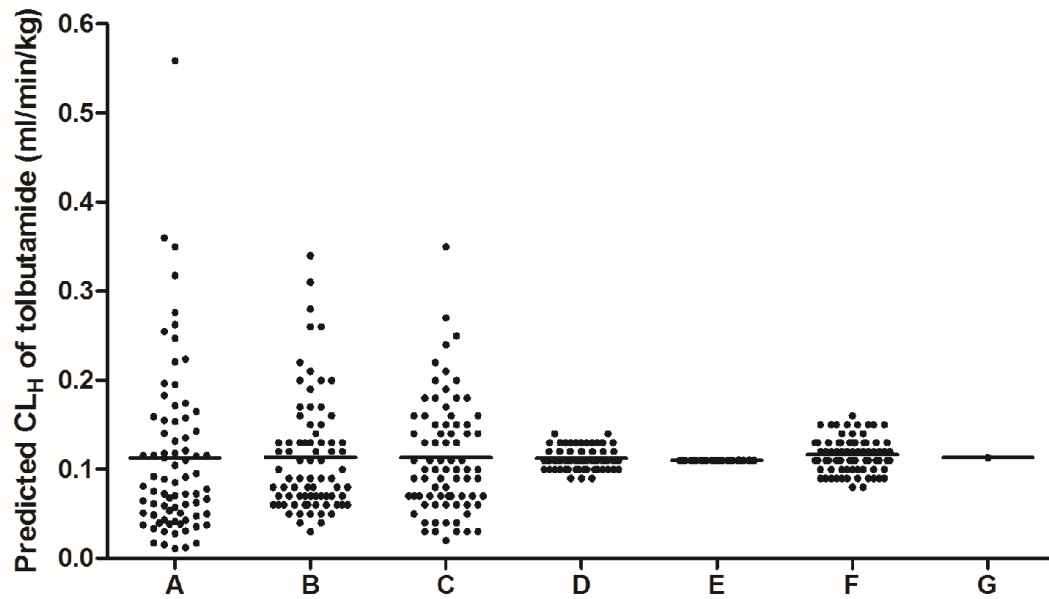

**Supplementary Fig. S3.** Effects of individual values for the five parameters on the prediction of hepatic tolbutamide clearance in a population of 78 samples. A to G represent the seven methods used. Method A used individual values for each parameter (MPPGL,  $CL_{int, in vitro}$ , LW,  $Q_H$  and BW) for 78 livers. Method B considered the individual MPPGL value and the mean values for the remaining four parameters. Similar to method B, methods C, D, E and F used the individual  $CL_{int, in vitro}$ , LW,  $Q_H$  or BW value, respectively, and the mean value for the remaining four parameters. Method G used mean values for the five parameters for that particular liver.
